# Supplementary material
Source: publisher figshare collection journal article supplement (https://acs.figshare.com/ndownloader/files/22583231)
Supplement: Supplementary file 1 [file 22583231]

SUPPORTING INFORMATION

For

# Charge-Separation-Type Ionic Crystals with Mixed $\text{Au}^{\text{I}}_4\text{Co}^{\text{III}}_2$ and $\text{Au}^{\text{I}}_4\text{Ni}^{\text{II}}\text{Co}^{\text{III}}$ Hexanuclear Complexes

*Rycce S. Pratikha, Tatsuhiko Kojima, Naoto Kuwamura, Nobuto Yoshinari, and Takumi Konno\**

Department of Chemistry, Graduate School of Science, Osaka University, Toyonaka, Osaka 560-0043, Japan

E-mail: [konno@chem.sci.osaka-u.ac.jp](mailto:konno@chem.sci.osaka-u.ac.jp)

**Table S1.** Crystal data for **1<sub>Li</sub>**, **1<sub>Na</sub>**, **1<sub>K</sub>**, **1<sub>Rb</sub>**, and **1<sub>Cs</sub>**.

|                                              | <b>1<sub>Li</sub></b>                                                                                                                                    | <b>1<sub>Na</sub></b>                                                                                                                                    | <b>1<sub>K</sub></b>                                                                                                                                                    | <b>1<sub>Rb</sub></b>                                                                                                                                                    | <b>1<sub>Cs</sub></b>                                                                                                                                                       |
|----------------------------------------------|----------------------------------------------------------------------------------------------------------------------------------------------------------|----------------------------------------------------------------------------------------------------------------------------------------------------------|-------------------------------------------------------------------------------------------------------------------------------------------------------------------------|--------------------------------------------------------------------------------------------------------------------------------------------------------------------------|-----------------------------------------------------------------------------------------------------------------------------------------------------------------------------|
| CCDC No.                                     | 1990698                                                                                                                                                  | 1989961                                                                                                                                                  | 1989962                                                                                                                                                                 | 1989963                                                                                                                                                                  | 1989964                                                                                                                                                                     |
| Formula                                      | C <sub>72</sub> H <sub>84</sub> Au <sub>4</sub> Co <sub>1.33</sub><br>N <sub>6</sub> Ni <sub>0.67</sub> O <sub>21.67</sub> P <sub>4</sub> S <sub>4</sub> | C <sub>72</sub> H <sub>84</sub> Au <sub>4</sub> Co <sub>1.33</sub><br>N <sub>6</sub> Ni <sub>0.67</sub> O <sub>21.67</sub> P <sub>4</sub> S <sub>4</sub> | C <sub>72</sub> H <sub>84</sub> Au <sub>4</sub> Co <sub>1.33</sub> K <sub>0.67</sub><br>N <sub>6</sub> Ni <sub>0.67</sub> O <sub>21</sub> P <sub>4</sub> S <sub>4</sub> | C <sub>72</sub> H <sub>84</sub> Au <sub>4</sub> Co <sub>1.33</sub> N <sub>6</sub><br>Ni <sub>0.67</sub> O <sub>21</sub> P <sub>4</sub> Rb <sub>0.67</sub> S <sub>4</sub> | C <sub>72</sub> H <sub>84</sub> Au <sub>4</sub> Co <sub>1.33</sub> Cs <sub>0.67</sub><br>N <sub>6</sub> Ni <sub>0.67</sub> O <sub>20.67</sub> P <sub>4</sub> S <sub>4</sub> |
| Color, form                                  | Purple, block                                                                                                                                            | Purple, block                                                                                                                                            | Purple, block                                                                                                                                                           | Purple, block                                                                                                                                                            | Purple, block                                                                                                                                                               |
| $\lambda$ =Wavelength/ Å                     | 0.4111                                                                                                                                                   | 0.630                                                                                                                                                    | 0.630                                                                                                                                                                   | 0.4248                                                                                                                                                                   | 0.630                                                                                                                                                                       |
| Crystal system                               | Cubic                                                                                                                                                    | Cubic                                                                                                                                                    | Cubic                                                                                                                                                                   | Cubic                                                                                                                                                                    | Cubic                                                                                                                                                                       |
| Space group                                  | <i>F</i> 23                                                                                                                                              | <i>F</i> 23                                                                                                                                              | <i>F</i> 23                                                                                                                                                             | <i>F</i> 23                                                                                                                                                              | <i>F</i> 23                                                                                                                                                                 |
| <i>a</i> / Å                                 | 37.528(2)                                                                                                                                                | 37.862(4)                                                                                                                                                | 37.923(4)                                                                                                                                                               | 37.8088(13)                                                                                                                                                              | 37.651(4)                                                                                                                                                                   |
| <i>b</i> / Å                                 | 37.528(2)                                                                                                                                                | 37.862(4)                                                                                                                                                | 37.923(4)                                                                                                                                                               | 37.8088(13)                                                                                                                                                              | 37.651(4)                                                                                                                                                                   |
| <i>c</i> / Å                                 | 37.528(2)                                                                                                                                                | 37.862(4)                                                                                                                                                | 37.923(4)                                                                                                                                                               | 37.8088(13)                                                                                                                                                              | 37.651(4)                                                                                                                                                                   |
| $\alpha$ /°                                  | 90                                                                                                                                                       | 90                                                                                                                                                       | 90                                                                                                                                                                      | 90                                                                                                                                                                       | 90                                                                                                                                                                          |
| $\beta$ /°                                   | 90                                                                                                                                                       | 90                                                                                                                                                       | 90                                                                                                                                                                      | 90                                                                                                                                                                       | 90                                                                                                                                                                          |
| $\gamma$ /°                                  | 90                                                                                                                                                       | 90                                                                                                                                                       | 90                                                                                                                                                                      | 90                                                                                                                                                                       | 90                                                                                                                                                                          |
| <i>V</i> / Å <sup>3</sup>                    | 52852(10)                                                                                                                                                | 54276(19)                                                                                                                                                | 54539(19)                                                                                                                                                               | 54048(6)                                                                                                                                                                 | 53374(17)                                                                                                                                                                   |
| <i>Z</i>                                     | 24                                                                                                                                                       | 24                                                                                                                                                       | 24                                                                                                                                                                      | 24                                                                                                                                                                       | 24                                                                                                                                                                          |
| <i>T</i> / K                                 | 100(2)                                                                                                                                                   | 100(2)                                                                                                                                                   | 100(2)                                                                                                                                                                  | 100(2)                                                                                                                                                                   | 100(2)                                                                                                                                                                      |
| F(000)                                       | 29424                                                                                                                                                    | 29424                                                                                                                                                    | 29600                                                                                                                                                                   | 29888                                                                                                                                                                    | 30112                                                                                                                                                                       |
| $\rho$ calcd / g· cm <sup>-3</sup>           | 1.914                                                                                                                                                    | 1.863                                                                                                                                                    | 1.866                                                                                                                                                                   | 1.905                                                                                                                                                                    | 1.949                                                                                                                                                                       |
| $\mu(\lambda)$ / mm <sup>-1</sup>            | 1.745                                                                                                                                                    | 5.147                                                                                                                                                    | 4.965                                                                                                                                                                   | 1.948                                                                                                                                                                    | 5.236                                                                                                                                                                       |
| Flack parameter                              | 0.058(11)                                                                                                                                                | 0.009(4)                                                                                                                                                 | 0.001(4)                                                                                                                                                                | 0.004(5)                                                                                                                                                                 | 0.003(4)                                                                                                                                                                    |
| Crystal size /mm <sup>3</sup>                | 0.08×0.04×0.04                                                                                                                                           | 0.03×0.03×0.03                                                                                                                                           | 0.041×0.034×0.031                                                                                                                                                       | 0.034×0.041×0.031                                                                                                                                                        | 0.07×0.06×0.03                                                                                                                                                              |
| Limiting indices                             | -48 ≤ <i>h</i> ≤ 48<br>-48 ≤ <i>k</i> ≤ 47<br>-47 ≤ <i>l</i> ≤ 48                                                                                        | -65 ≤ <i>h</i> ≤ 65<br>-45 ≤ <i>k</i> ≤ 46<br>-44 ≤ <i>l</i> ≤ 45                                                                                        | -45 ≤ <i>h</i> ≤ 46<br>-64 ≤ <i>k</i> ≤ 65<br>-45 ≤ <i>l</i> ≤ 43                                                                                                       | -49 ≤ <i>h</i> ≤ 48<br>-31 ≤ <i>k</i> ≤ 39<br>-44 ≤ <i>l</i> ≤ 49                                                                                                        | -51 ≤ <i>h</i> ≤ 51<br>-51 ≤ <i>k</i> ≤ 51<br>-60 ≤ <i>l</i> ≤ 51                                                                                                           |
| R1 ( <i>I</i> >2σ( <i>I</i> )) <sup>a)</sup> | 0.0360                                                                                                                                                   | 0.0554                                                                                                                                                   | 0.0691                                                                                                                                                                  | 0.0212                                                                                                                                                                   | 0.0384                                                                                                                                                                      |
| Rw2 (all data) <sup>b)</sup>                 | 0.0891                                                                                                                                                   | 0.1390                                                                                                                                                   | 0.1737                                                                                                                                                                  | 0.0537                                                                                                                                                                   | 0.0870                                                                                                                                                                      |
| GOF                                          | 1.038                                                                                                                                                    | 1.063                                                                                                                                                    | 1.109                                                                                                                                                                   | 1.077                                                                                                                                                                    | 0.925                                                                                                                                                                       |

**Table S2.** Crystal data for **1<sub>Ca</sub>**, **1<sub>Sr</sub>**, and **1<sub>Ba</sub>**.

|                                              | <b>1<sub>Ca</sub></b>                                                                                                                                                       | <b>1<sub>Sr</sub></b>                                                                                                                                                        | <b>1<sub>Ba</sub></b>                                                                                                                                                       |
|----------------------------------------------|-----------------------------------------------------------------------------------------------------------------------------------------------------------------------------|------------------------------------------------------------------------------------------------------------------------------------------------------------------------------|-----------------------------------------------------------------------------------------------------------------------------------------------------------------------------|
| CCDC No.                                     | 1989965                                                                                                                                                                     | 1989966                                                                                                                                                                      | 1989967                                                                                                                                                                     |
| Formula                                      | C <sub>72</sub> H <sub>84</sub> Au <sub>4</sub> Ca <sub>0.33</sub> Co <sub>1.33</sub><br>N <sub>6.67</sub> Ni <sub>0.67</sub> O <sub>22</sub> P <sub>4</sub> S <sub>4</sub> | C <sub>72</sub> H <sub>84</sub> Au <sub>4</sub> Co <sub>1.33</sub> Ni <sub>6.67</sub><br>Ni <sub>0.67</sub> O <sub>22</sub> P <sub>4</sub> S <sub>4</sub> Sr <sub>0.33</sub> | C <sub>72</sub> H <sub>84</sub> Au <sub>4</sub> Ba <sub>0.33</sub> Co <sub>1.33</sub><br>N <sub>6.67</sub> Ni <sub>0.67</sub> O <sub>22</sub> P <sub>4</sub> S <sub>4</sub> |
| Color, form                                  | Purple, block                                                                                                                                                               | Purple, block                                                                                                                                                                | Purple, block                                                                                                                                                               |
| $\lambda$ =Wavelength/ Å                     | 0.600                                                                                                                                                                       | 0.4248                                                                                                                                                                       | 0.630                                                                                                                                                                       |
| Crystal system                               | Cubic                                                                                                                                                                       | Cubic                                                                                                                                                                        | Cubic                                                                                                                                                                       |
| Space group                                  | <i>F</i> 23                                                                                                                                                                 | <i>F</i> 23                                                                                                                                                                  | <i>F</i> 23                                                                                                                                                                 |
| <i>a</i> / Å                                 | 37.650(2)                                                                                                                                                                   | 37.749(16)                                                                                                                                                                   | 37.910(4)                                                                                                                                                                   |
| <i>b</i> / Å                                 | 37.650(2)                                                                                                                                                                   | 37.749(16)                                                                                                                                                                   | 37.910(4)                                                                                                                                                                   |
| <i>c</i> / Å                                 | 37.650(2)                                                                                                                                                                   | 37.749(16)                                                                                                                                                                   | 37.910(4)                                                                                                                                                                   |
| $\alpha$ /°                                  | 90                                                                                                                                                                          | 90                                                                                                                                                                           | 90                                                                                                                                                                          |
| $\beta$ /°                                   | 90                                                                                                                                                                          | 90                                                                                                                                                                           | 90                                                                                                                                                                          |
| $\gamma$ /°                                  | 90                                                                                                                                                                          | 90                                                                                                                                                                           | 90                                                                                                                                                                          |
| <i>V</i> / Å <sup>3</sup>                    | 53370(9)                                                                                                                                                                    | 53792(67)                                                                                                                                                                    | 54483(19)                                                                                                                                                                   |
| <i>Z</i>                                     | 24                                                                                                                                                                          | 24                                                                                                                                                                           | 24                                                                                                                                                                          |
| <i>T</i> / K                                 | 100(2)                                                                                                                                                                      | 100(2)                                                                                                                                                                       | 100(2)                                                                                                                                                                      |
| F(000)                                       | 29760                                                                                                                                                                       | 29904                                                                                                                                                                        | 30048                                                                                                                                                                       |
| $\rho$ calcd / g· cm <sup>-3</sup>           | 1.916                                                                                                                                                                       | 1.913                                                                                                                                                                        | 1.901                                                                                                                                                                       |
| $\mu(\lambda)$ / mm <sup>-1</sup>            | 4.455                                                                                                                                                                       | 1.917                                                                                                                                                                        | 5.048                                                                                                                                                                       |
| Flack parameter                              | 0.004(4)                                                                                                                                                                    | 0.009(9)                                                                                                                                                                     | 0.004(3)                                                                                                                                                                    |
| Crystal size /mm <sup>3</sup>                | 0.06×0.04×0.04                                                                                                                                                              | 0.06×0.05×0.04                                                                                                                                                               | 0.064×0.055×0.045                                                                                                                                                           |
| Limiting indices                             | −59 ≤ <i>h</i> ≤ 57<br>−59 ≤ <i>k</i> ≤ 59<br>−57 ≤ <i>l</i> ≤ 55                                                                                                           | −35 ≤ <i>h</i> ≤ 45<br>−47 ≤ <i>k</i> ≤ 49<br>−38 ≤ <i>l</i> ≤ 49                                                                                                            | −45 ≤ <i>h</i> ≤ 44<br>−64 ≤ <i>k</i> ≤ 65<br>−43 ≤ <i>l</i> ≤ 44                                                                                                           |
| R1 ( <i>I</i> >2σ( <i>I</i> )) <sup>a)</sup> | 0.0372                                                                                                                                                                      | 0.0365                                                                                                                                                                       | 0.0562                                                                                                                                                                      |
| Rw2 (all data) <sup>b)</sup>                 | 0.0856                                                                                                                                                                      | 0.0834                                                                                                                                                                       | 0.1470                                                                                                                                                                      |
| GOF                                          | 1.026                                                                                                                                                                       | 1.019                                                                                                                                                                        | 1.105                                                                                                                                                                       |

**Table S3.** Selected bond distances (Å) for **1<sub>Li</sub>**, **1<sub>Na</sub>**, **1<sub>K</sub>**, **1<sub>Rb</sub>**, and **1<sub>Cs</sub>**.

|        | <b>1<sub>Li</sub></b> | <b>1<sub>Na</sub></b> | <b>1<sub>K</sub></b> | <b>1<sub>Rb</sub></b> | <b>1<sub>Cs</sub></b> |
|--------|-----------------------|-----------------------|----------------------|-----------------------|-----------------------|
| M-S/ Å | 2.329(4)/2.356(3)     | 2.342(3)/2.356(3)     | 2.349(4)/2.375(3)    | 2.358(3)/2.373(3)     | 2.353(5)/2.360(5)     |
| M-O/ Å | 1.946(9)/1.970(8)     | 1.947(7)/1.967(7)     | 1.974(10)/1.974(9)   | 1.944(6)/1.997(6)     | 1.919(11)/1.998(10)   |
| M-N/ Å | 2.000(10)/2.007(11)   | 1.987(8)/1.995(8)     | 2.018(12)/2.022(12)  | 1.990(8)/2.016(8)     | 1.944(14)/1.991(13)   |

**Table S4.** Selected bond distances (Å) for **1<sub>Ca</sub>**, **1<sub>Sr</sub>**, and **1<sub>Ba</sub>**.

|        | <b>1<sub>Ca</sub></b> | <b>1<sub>Sr</sub></b> | <b>1<sub>Ba</sub></b> |
|--------|-----------------------|-----------------------|-----------------------|
| M-S/ Å | 2.327(2)/2.348(2)     | 2.344(3)/2.366(3)     | 2.345(3)/2.362(3)     |
| M-O/ Å | 1.934(6)/1.963(6)     | 1.948(8)/1.974(8)     | 1.954(9)/1.976(7)     |
| M-N/ Å | 1.987(8)/1.995(8)     | 2.004(10)/2.023(10)   | 1.998(10)/2.019(11)   |

### Preparation of **1<sub>Li</sub>**.

To a colorless solution of  $[\text{Au}_2(\text{dppe})(\text{D-Hpen})_2] \cdot 8\text{H}_2\text{O}$  (0.10 g, 0.082 mmol) in methanol (16 mL) was added a pink methanol solution (16 mL) containing  $\text{Co}(\text{OAc})_2 \cdot 4\text{H}_2\text{O}$  (0.011 g, 0.046 mmol) and  $\text{Ni}(\text{OAc})_2 \cdot 4\text{H}_2\text{O}$  (0.011 g, 0.046 mmol). After stirring at room temperature for 3 h in air, the solution turned brown. Subsequently, a 0.5 M  $\text{LiNO}_3$  aqueous solution (1.5 mL) was added to the brown solution. Slow evaporation of the solution at room temperature for 7 days gave a mixture of purple block crystals (**1<sub>Li</sub>**) and green needle crystals (**2**). Purple crystals of **1<sub>Li</sub>** were obtained as a pure product from the mixture by dissolving **2** using a mixture of methanol and  $\text{H}_2\text{O}$ .

Yield for **1<sub>Li</sub>**: 71 mg (66%). Anal. Calc for  $(\text{H}_3\text{O})_{0.67}[\text{Au}_4\text{Ni}_{0.67}\text{Co}_{1.33}(\text{dppe})_2(\text{D-pen})_4](\text{NO}_3)_2 \cdot 10\text{H}_2\text{O} = \text{C}_{72}\text{H}_{106.01}\text{Au}_4\text{Co}_{1.33}\text{Ni}_{0.67}\text{O}_{24.67}\text{P}_4\text{S}_4$ : C, 33.16; H, 4.10; N, 3.22%. Found: C, 33.20; H, 4.03; N, 3.14%. IR spectrum ( $\text{cm}^{-1}$ , ATR): 1653/1604 ( $\nu_{\text{COO}^-}$ ), 1105 ( $\nu_{\text{P-Ph}}$ ), 735-692 ( $\nu_{\text{Ph}}$ ) and 1350 ( $\nu_{\text{NO}_3^-}$ ). The yield of **2** was estimated to be 16 % based on the weight loss after dissolving **2**.

### X-ray crystallography of **1<sub>Li</sub>**.

The diffraction data for **1<sub>Li</sub>** were recorded at 100 K with a PILATUS3 X CdTe 1M with synchrotron radiation ( $\lambda = 0.4111 \text{ \AA}$ ) at SPring-8 (BL02B1 beamline). The diffraction images were processed by using RAPID-AUTO. The structures were solved by direct methods using SHELXS-2014. The structure refinements were carried out using full-matrix least-squares (SHELXL-2018/3).

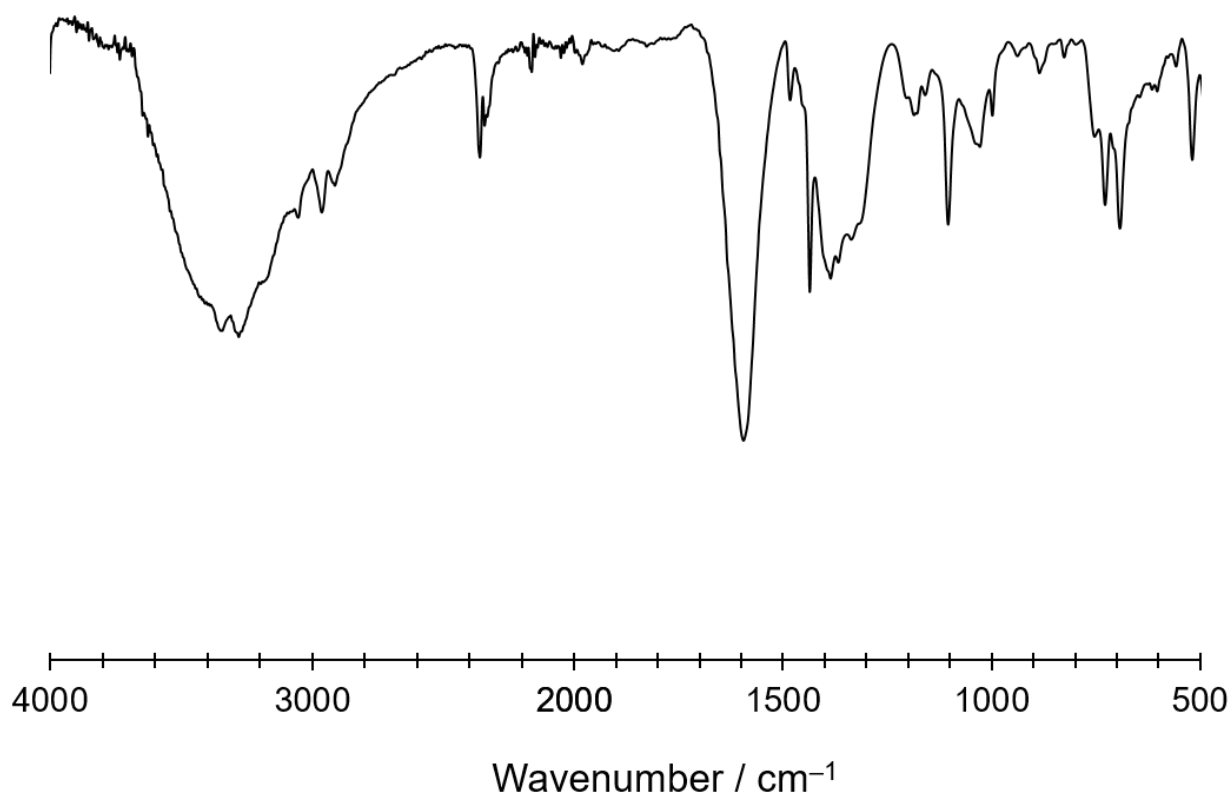

**Figure S1.** IR spectrum (ATR) of **2**.

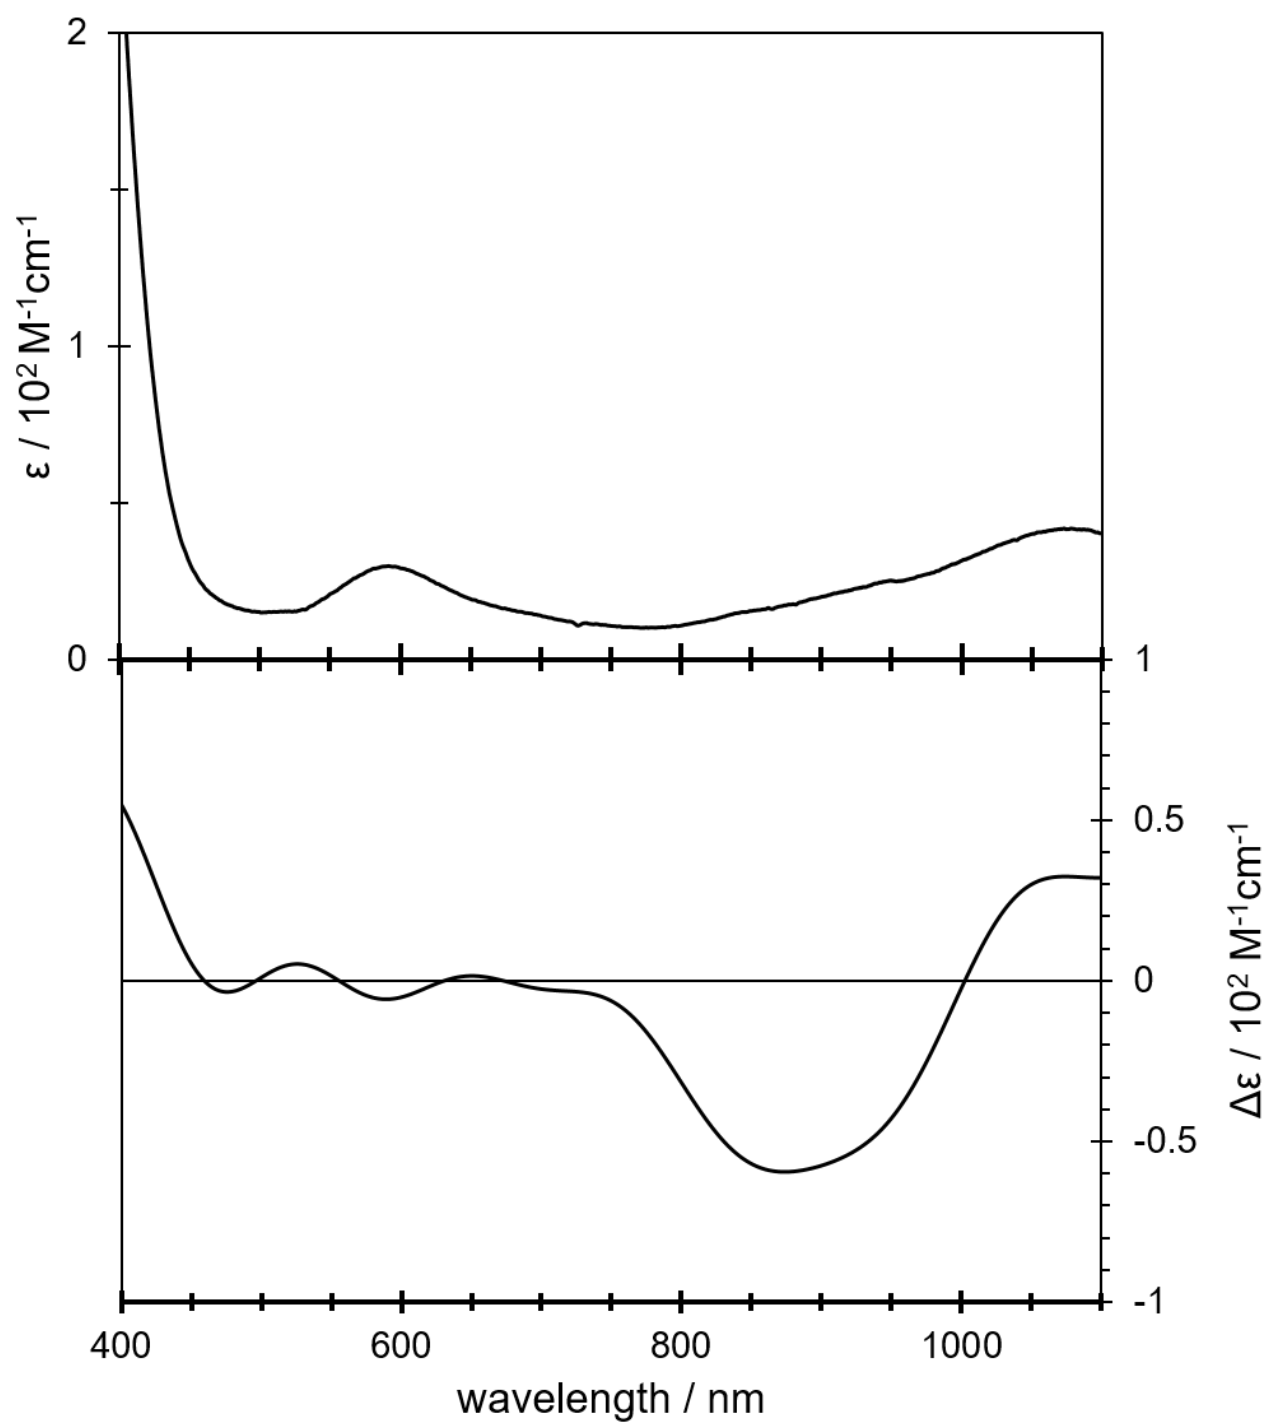

**Figure S2.** Absorption (top) and CD (bottom) spectra of **2** in methanol.

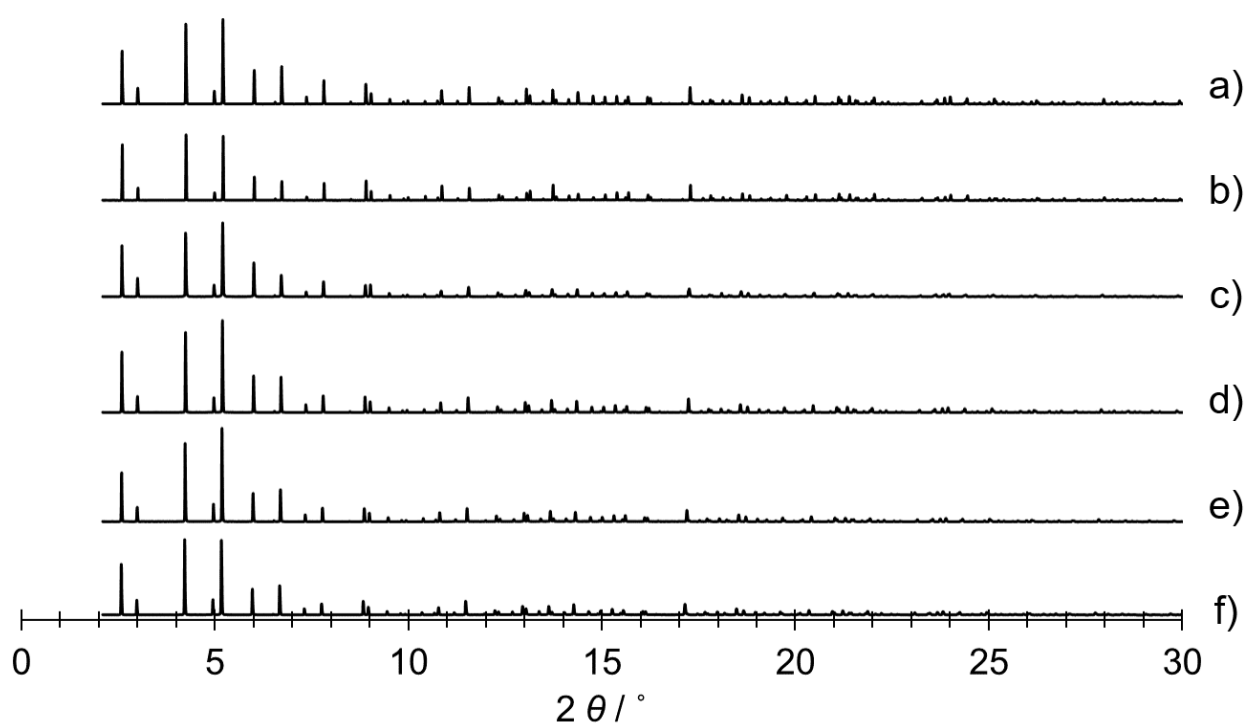

**Figure S3.** PXRD patterns ( $\lambda = 1.000 \text{ \AA}$ ). a)  $[\text{Co}^{\text{III}}_2(\text{L}^{\text{Au}})_2](\text{NO}_3)_2$ , b) **1**<sub>Li</sub>, c) **1**<sub>Na</sub>, d) **1**<sub>K</sub>, e) **1**<sub>Rb</sub>, and f) **1**<sub>Cs</sub>.



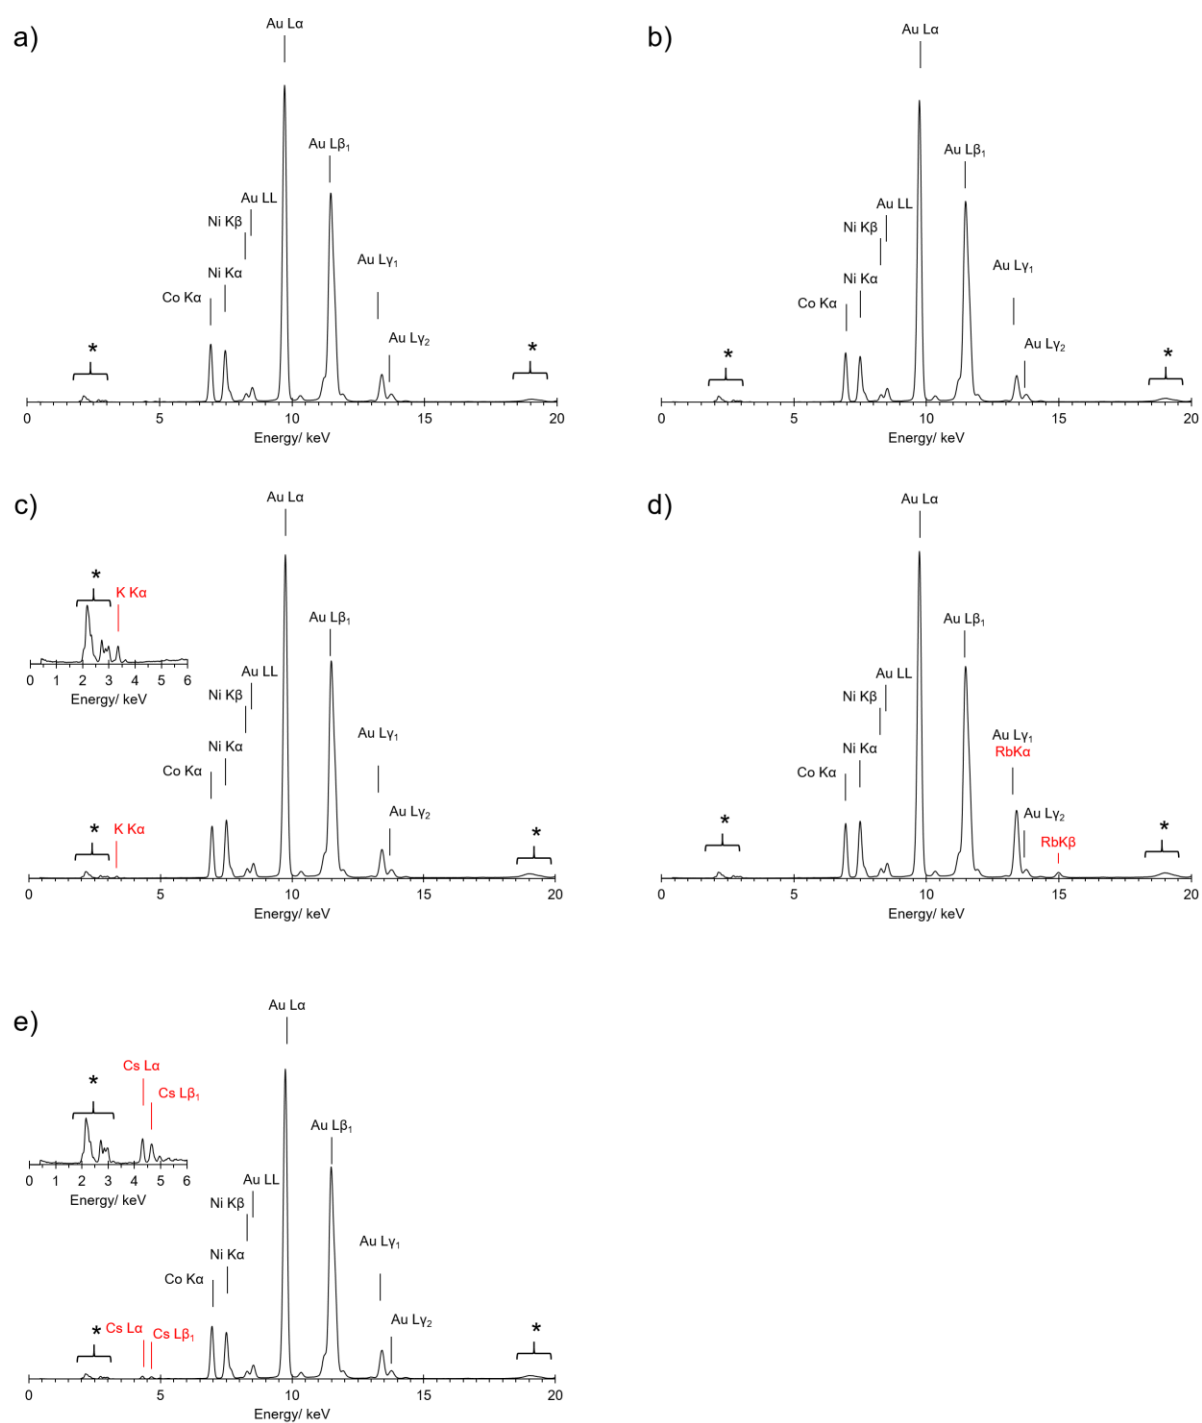

**Figure S4.** X-ray fluorescence spectra of a)  $1\text{Li}$ , b)  $1\text{Na}$ , c)  $1\text{K}$ , d)  $1\text{Rb}$ , and e)  $1\text{Cs}$ . \* represents signals from the X-ray tube. The inset represents the magnified spectrum (0~6 keV).

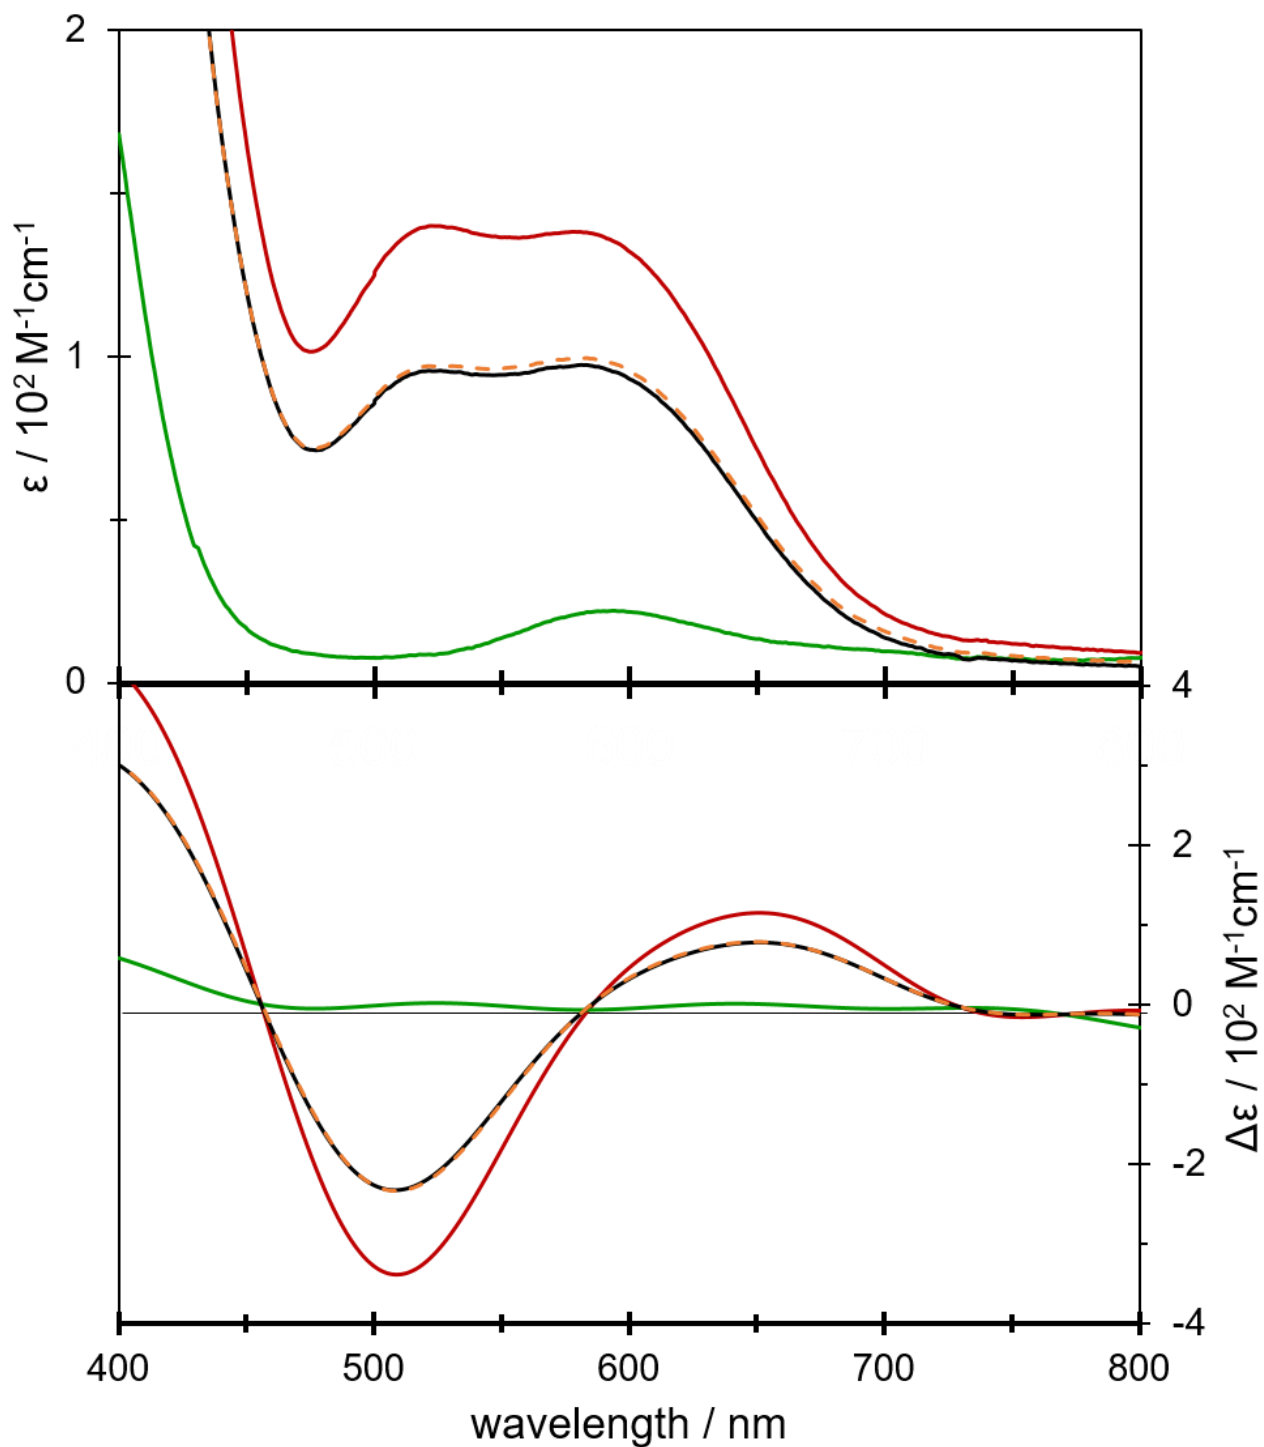

**Figure S5.** Absorption (top) and CD (bottom) spectra in methanol: black line; **1**<sub>Na</sub>, red line; [Co<sup>III</sup><sub>2</sub>(L<sup>Au</sup>)<sub>2</sub>](NO<sub>3</sub>)<sub>2</sub>, green line; [Ni<sup>II</sup><sub>2</sub>(L<sup>Au</sup>)<sub>2</sub>], orange broken line; a mixture of [Ni<sup>II</sup><sub>2</sub>(L<sup>Au</sup>)<sub>2</sub>] and [Co<sup>III</sup><sub>2</sub>(L<sup>Au</sup>)<sub>2</sub>](NO<sub>3</sub>)<sub>2</sub> in a 1:2 ratio.

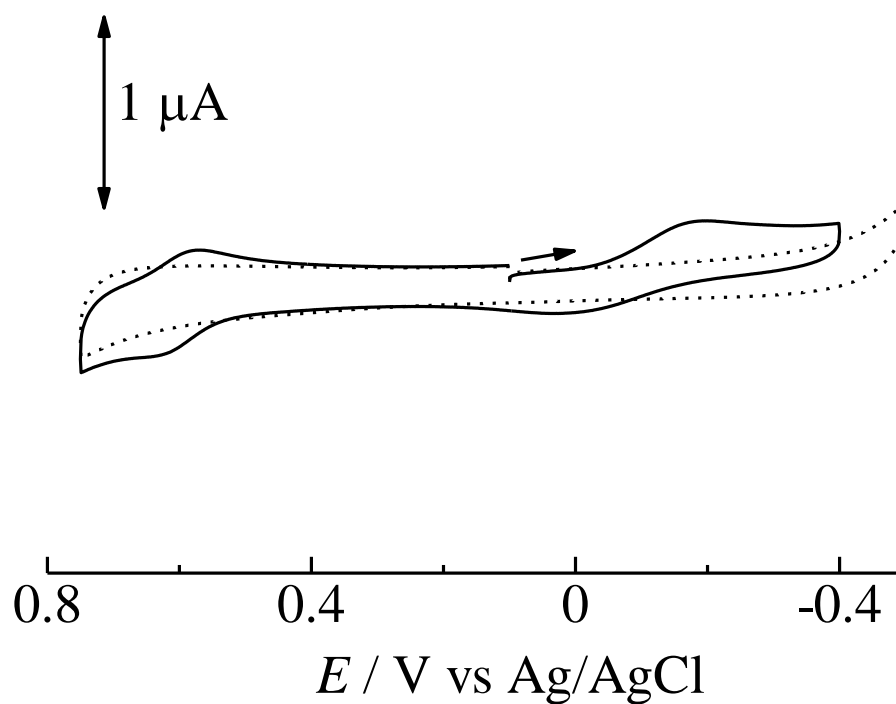

**Figure S6.** Cyclic voltammograms of **1<sub>Na</sub>** (solid line) and blank (dotted line) in MeOH containing 0.1 M NaBF<sub>4</sub> with a scan rate of 30 mV/sec.

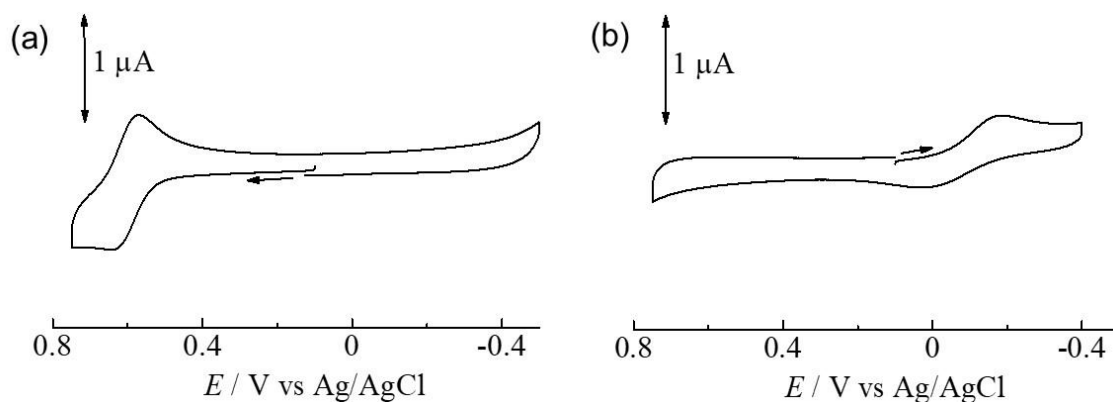

**Figure S7.** Cyclic voltammograms of [Ni<sup>II</sup><sub>2</sub>(L<sup>Au</sup>)<sub>2</sub>] (a) and [Co<sup>III</sup><sub>2</sub>(L<sup>Au</sup>)<sub>2</sub>](NO<sub>3</sub>)<sub>2</sub> (b) in MeOH containing 0.1 M NaBF<sub>4</sub> with a scan rate of 30 mV/sec.

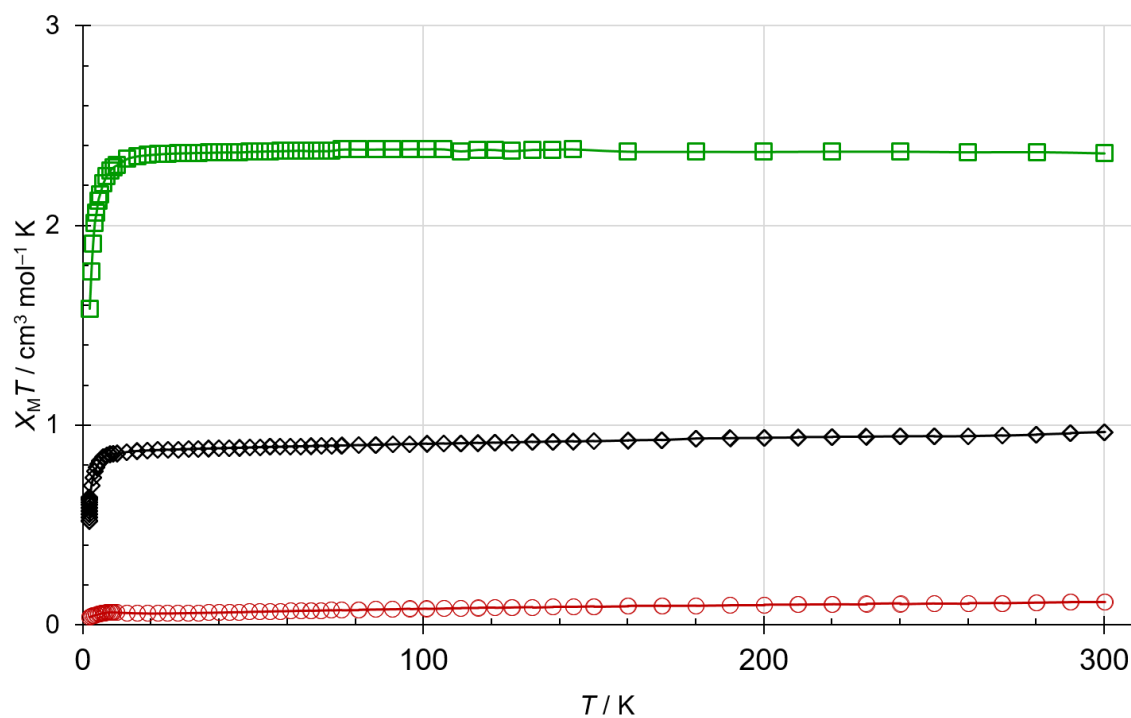

**Figure S8.** The  $\chi_M T$  vs  $T$  plots for **1<sub>Na</sub>** (black),  $[\text{Ni}^{\text{II}}_2(\text{L}^{\text{Au}})_2]$  (green), and  $[\text{Co}^{\text{III}}_2(\text{L}^{\text{Au}})_2](\text{NO}_3)_2$  (red).

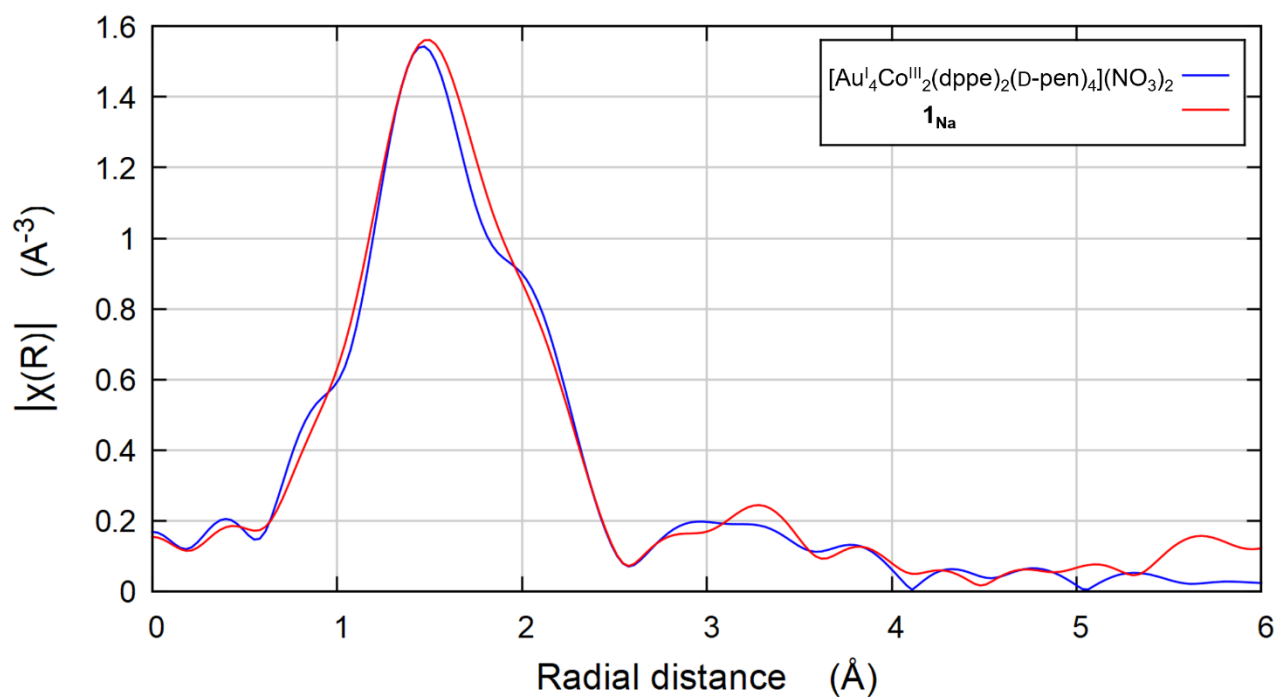

**Figure S9.** Fourier transforms of the Co K-edge EXAFS of **1<sub>Na</sub>** (red line) and  $[\text{Co}^{\text{III}}_2(\text{L}^{\text{Au}})_2](\text{NO}_3)_2$  (blue line).

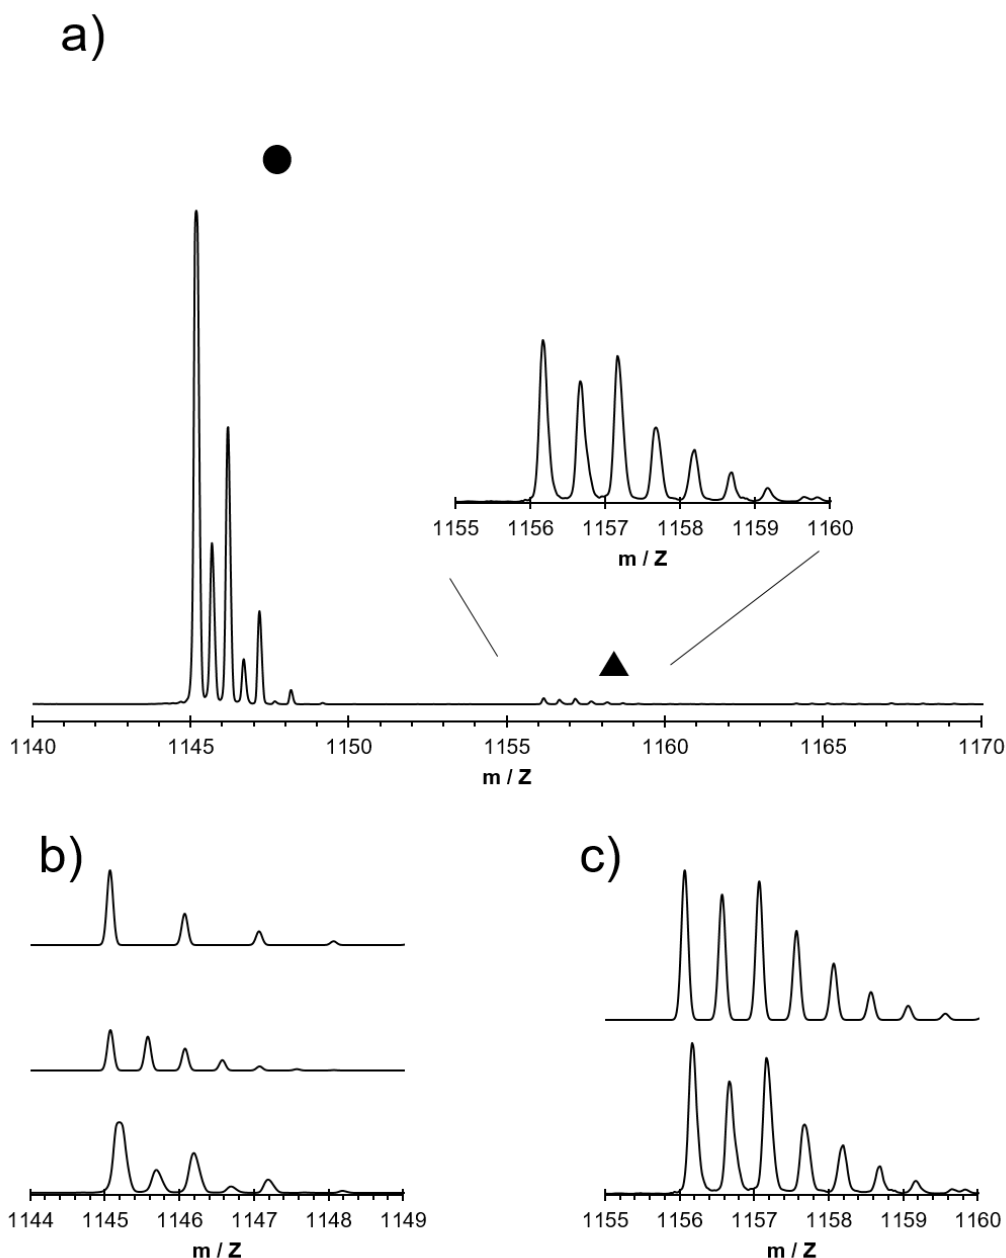

**Figure S10.** a) ESI mass spectrum of **1<sub>Na</sub>** in MeOH (positive mode). b) The observed (bottom) and simulated isotope patterns for  $[\text{Au}^{\text{I}}_2\text{Co}^{\text{III}}(\text{dppe})(\text{D-pen})_2]^+$  (top) and  $[\text{Au}^{\text{I}}_4\text{Co}^{\text{III}}_2(\text{dppe})_2(\text{D-pen})_4]^{2+}$  (middle) at  $m/Z = 1145.2$  (●). c) The observed (bottom) and simulated (top) isotope patterns for  $\{[\text{Au}^{\text{I}}_4\text{Ni}^{\text{II}}\text{Co}^{\text{III}}(\text{dppe})_2(\text{D-pen})_4] + \text{Na}\}^{2+}$  at  $m/Z = 1156.2$  (▲).

The observed pattern at  $m/Z = 1145.2$  (●) for **1<sub>Na</sub>** matches well with the simulated pattern of a 2:1 mixture of the trinuclear  $[\text{Au}^{\text{I}}_2\text{Co}^{\text{III}}(\text{dppe})(\text{D-pen})_2]^+$  and the hexanuclear  $[\text{Au}^{\text{I}}_4\text{Co}^{\text{III}}_2(\text{dppe})_2(\text{D-pen})_4]^{2+}$ , indicative of the equilibrium between the trinuclear and the hexanuclear structures in solution for  $[\text{Au}^{\text{I}}_4\text{Co}^{\text{III}}_2(\text{dppe})_2(\text{D-pen})_4]^{2+}$ .

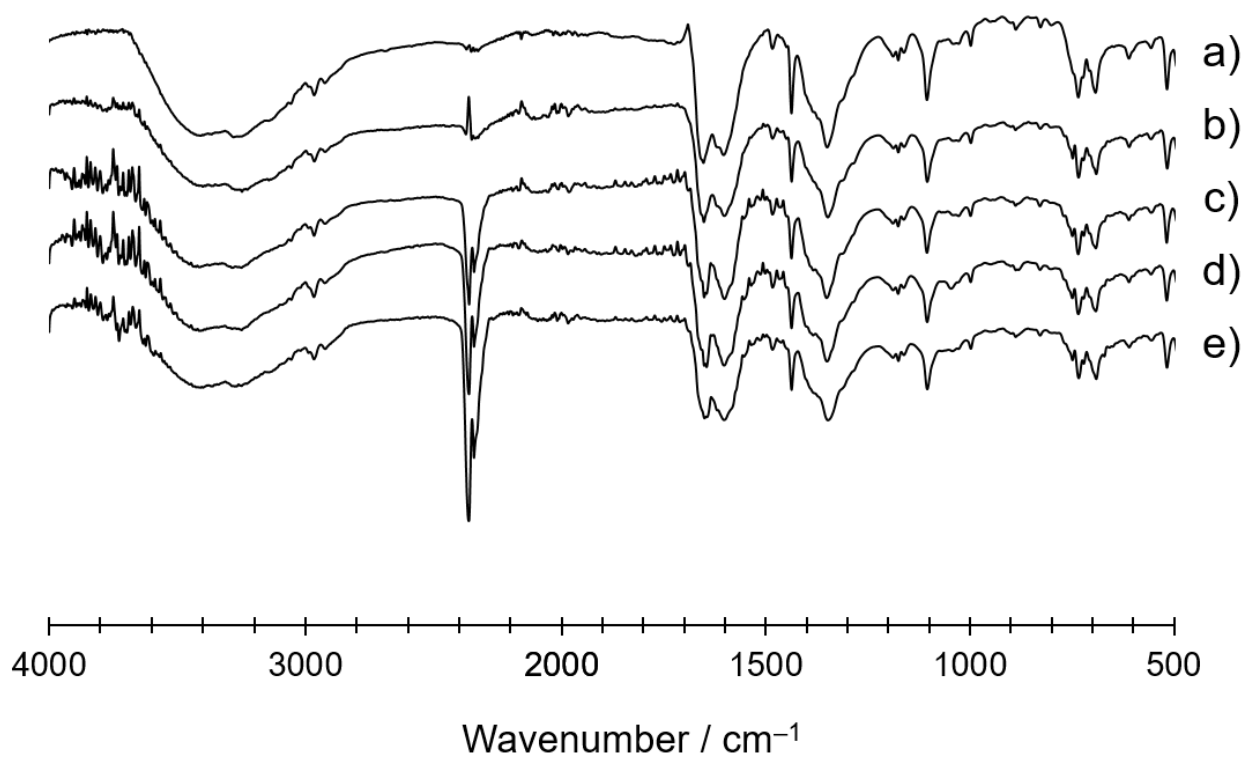

**Figure S11.** IR spectra (ATR): a) **1Li**, b) **1Na**, c) **1K**, d) **1Rb**, and e) **1Cs**.

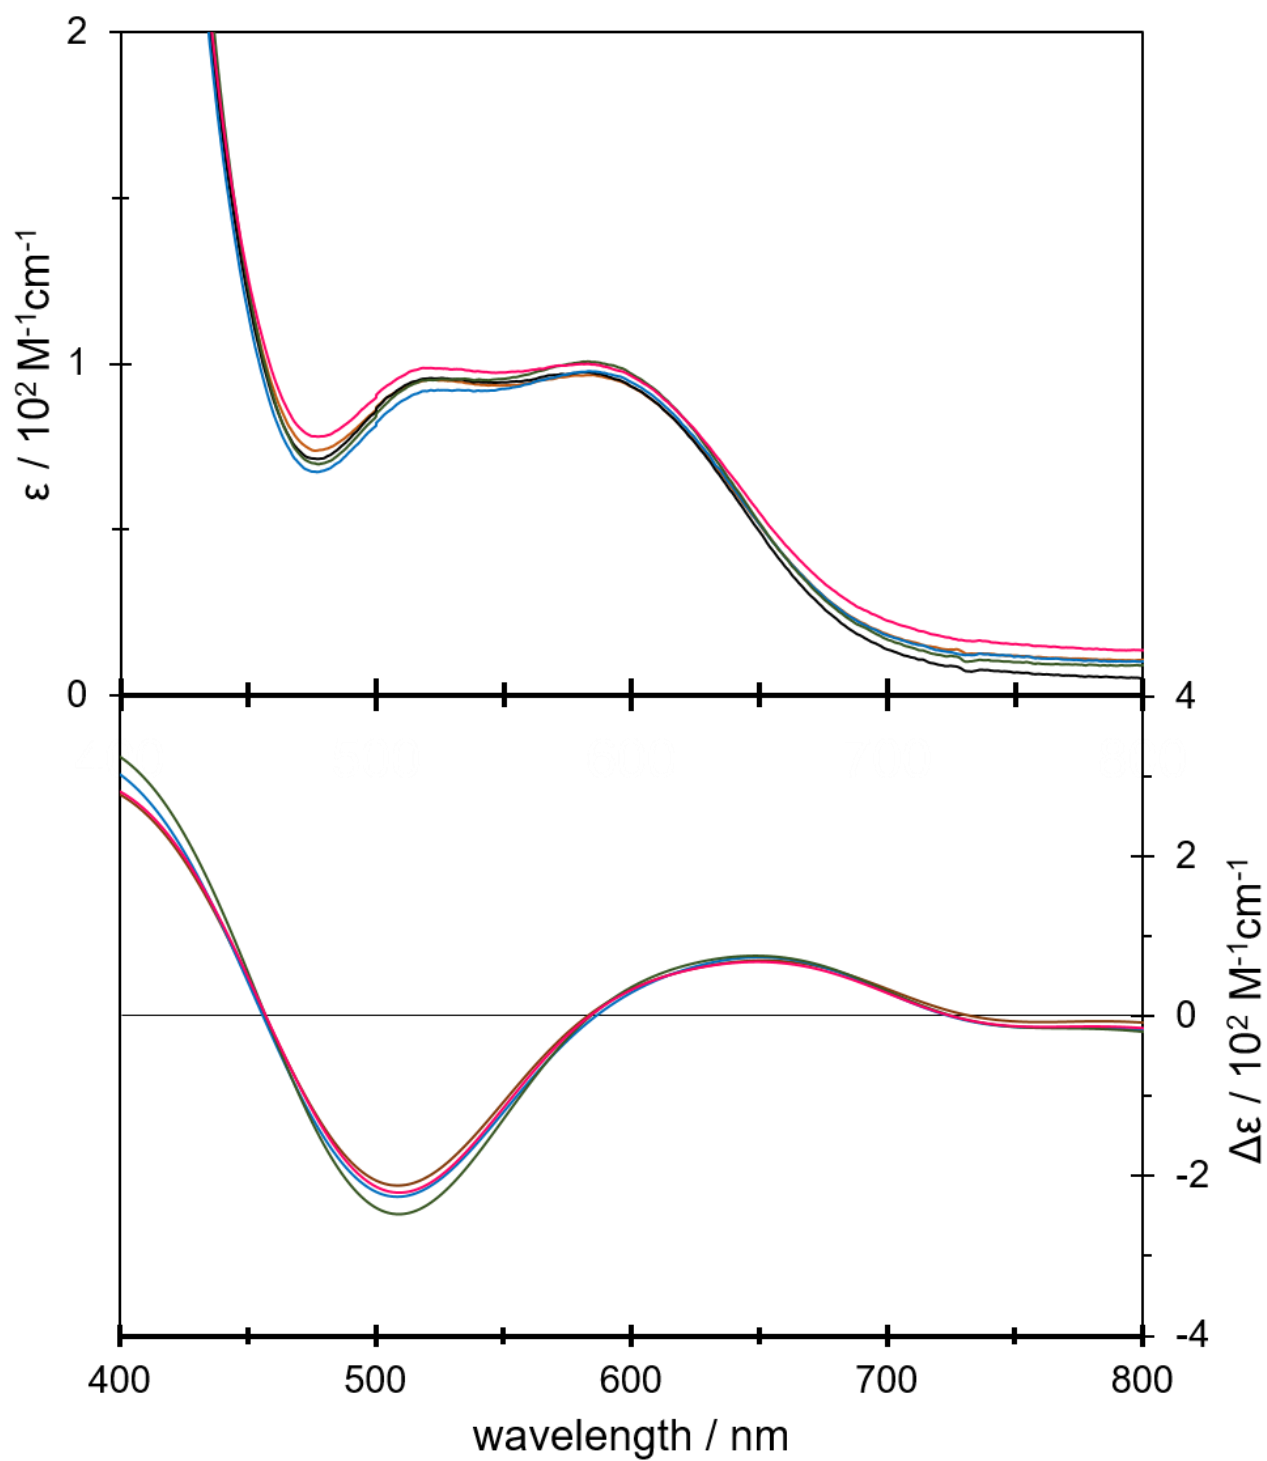

**Figure S12.** Absorption (top) and CD (bottom) spectra in methanol: brown; **1**<sub>Li</sub>, black; **1**<sub>Na</sub>, blue; **1**<sub>K</sub>, green; **1**<sub>Rb</sub>, pink; **1**<sub>Cs</sub>.

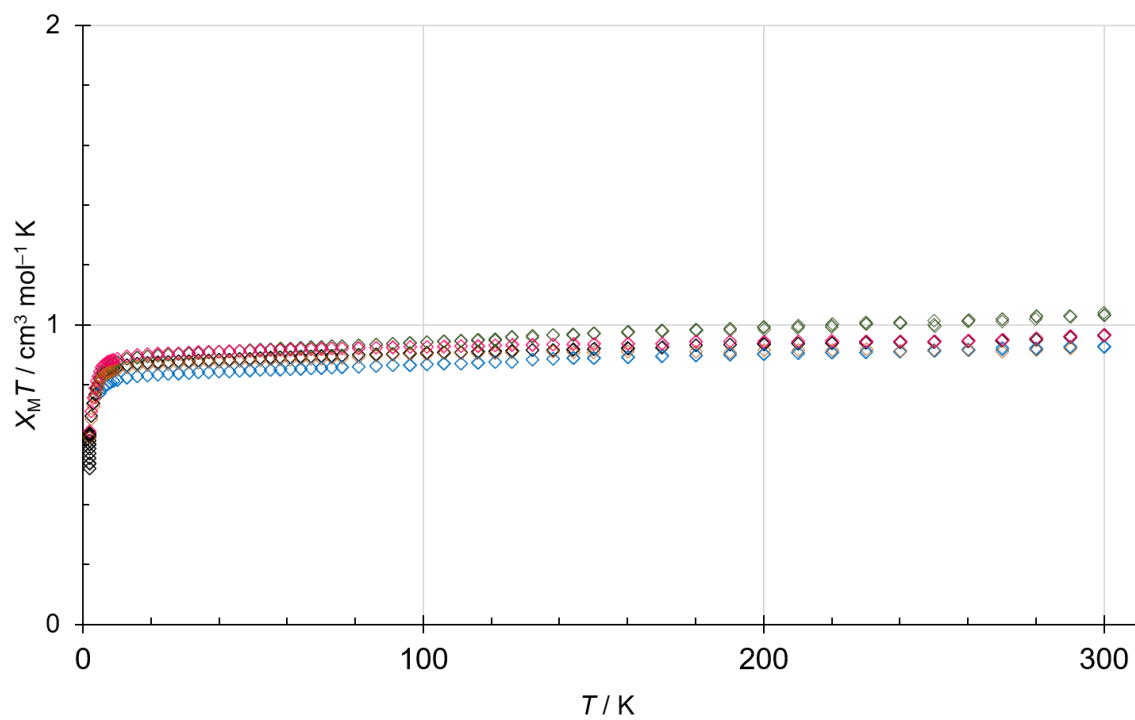

**Figure S13.** The  $\chi_M T$  vs  $T$  plots: brown; **1**<sub>Li</sub>, black; **1**<sub>Na</sub>, blue; **1**<sub>K</sub>, green; **1**<sub>Rb</sub>, pink; **1**<sub>Cs</sub>.



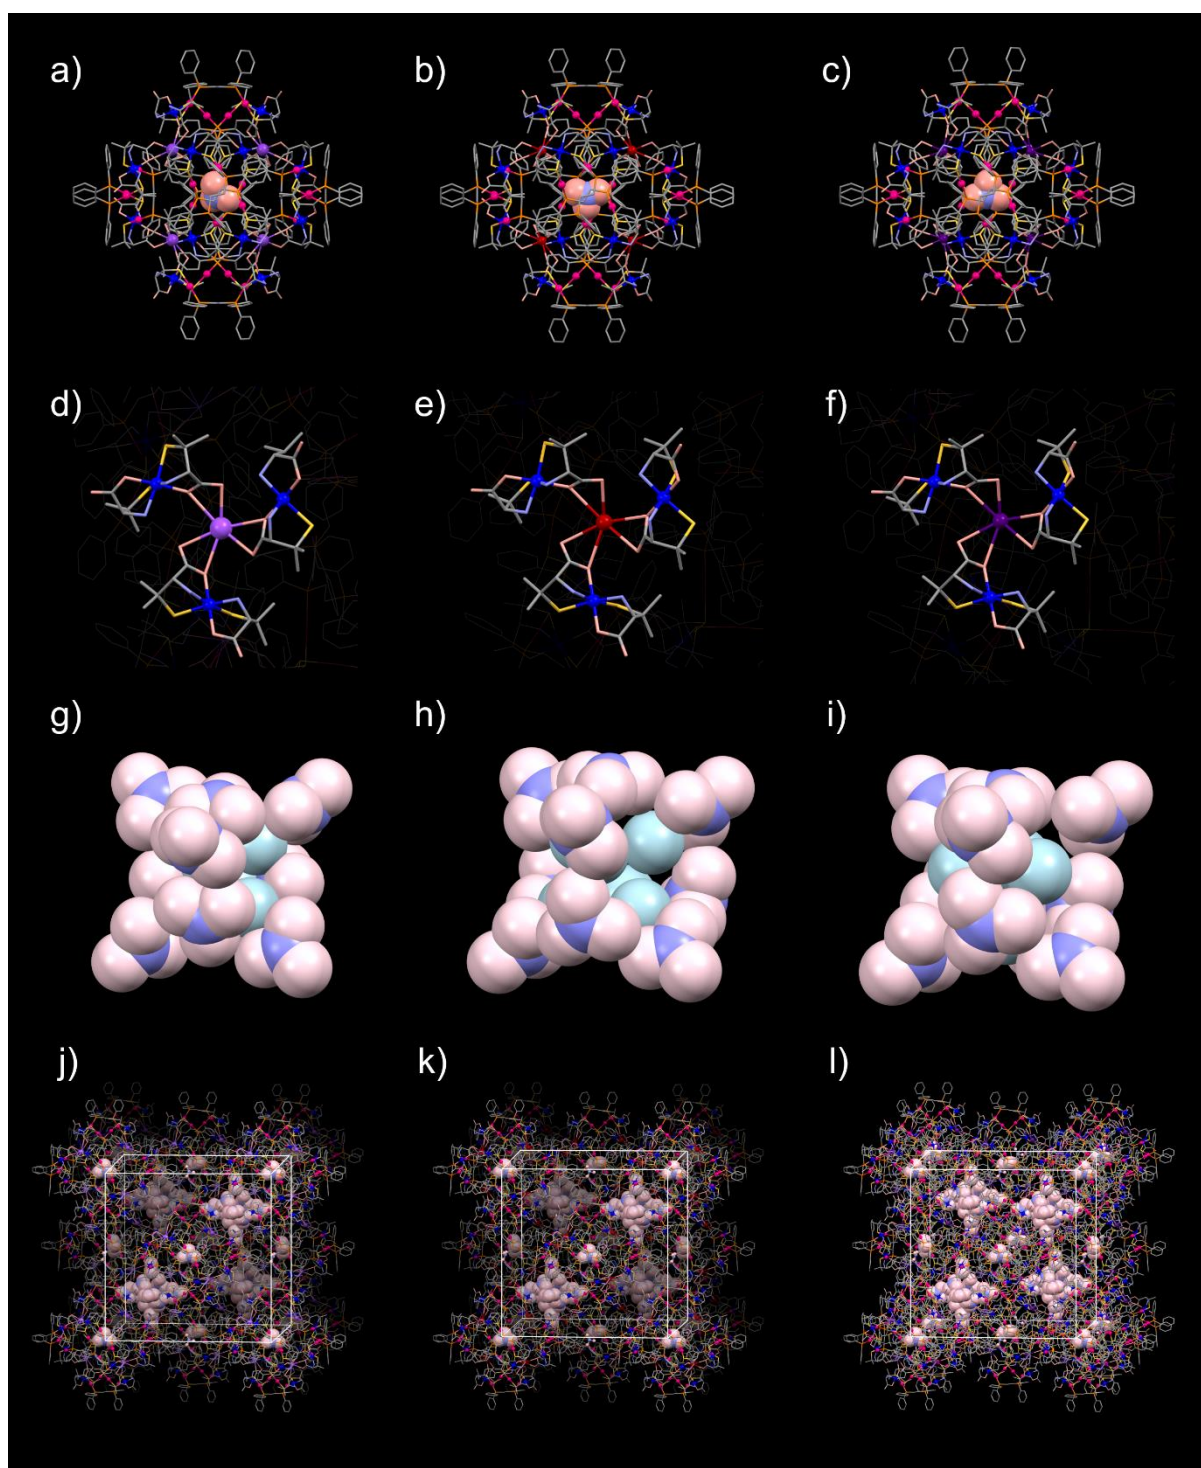

**Figure S14.** Crystal structures of **1<sub>K</sub>**, **1<sub>Rb</sub>**, and **1<sub>Cs</sub>**. Cationic supramolecular octahedra in **1<sub>K</sub>** (a), **1<sub>Rb</sub>** (b) and **1<sub>Cs</sub>** (c).  $M^I$  ion surrounded by D-pen carboxylate groups in **1<sub>K</sub>** (d), **1<sub>Rb</sub>** (e) and **1<sub>Cs</sub>** (f). Adamantane-like nitrate cluster in **1<sub>K</sub>** (g), **1<sub>Rb</sub>** (h) and **1<sub>Cs</sub>** (i). Packing structure of **1<sub>K</sub>** (j), **1<sub>Rb</sub>** (k) and **1<sub>Cs</sub>** (l). Nitrate anions are represented by a space-filling model. Color codes: red, Au; blue, Co/Ni; orange, P; yellow, S; pink/light pink, O; pale blue, N; gray, C; purple, K; brown, Rb; violet, Cs.

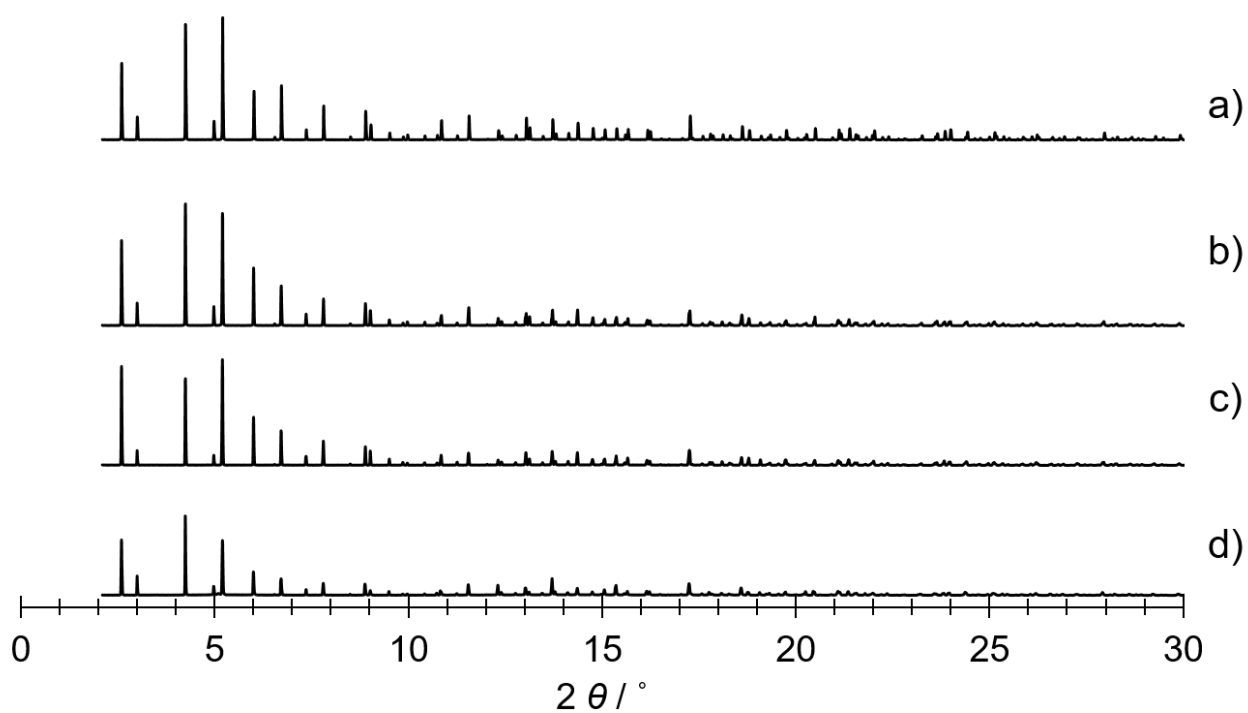

**Figure S15.** PXRD patterns ( $\lambda = 1.000 \text{ \AA}$ ). a)  $[\text{Co}^{\text{III}}_2(\text{L}^{\text{Au}})_2](\text{NO}_3)_2$ , b) **1**<sub>Ca</sub>, c) **1**<sub>Sr</sub>, and d) **1**<sub>Ba</sub>.

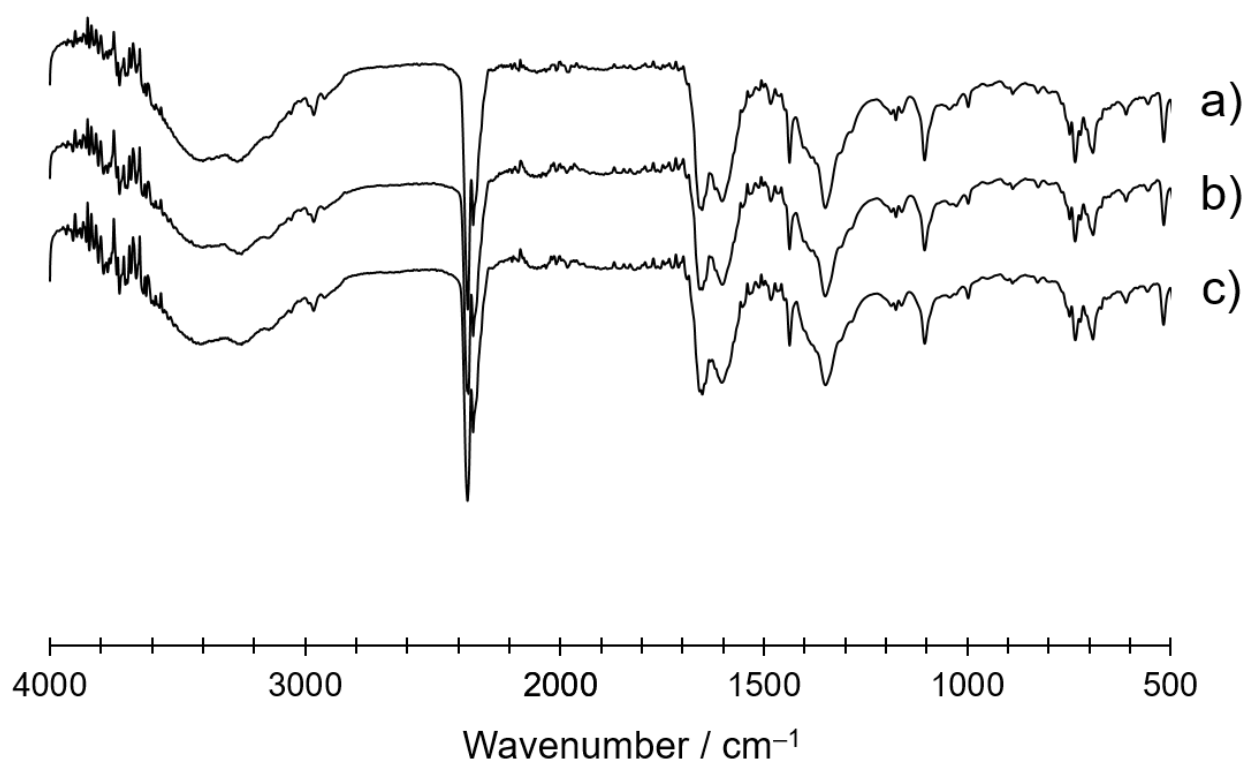

**Figure S16.** IR spectra (ATR): a) **1**<sub>Ca</sub>, b) **1**<sub>Sr</sub>, and c) **1**<sub>Ba</sub>.

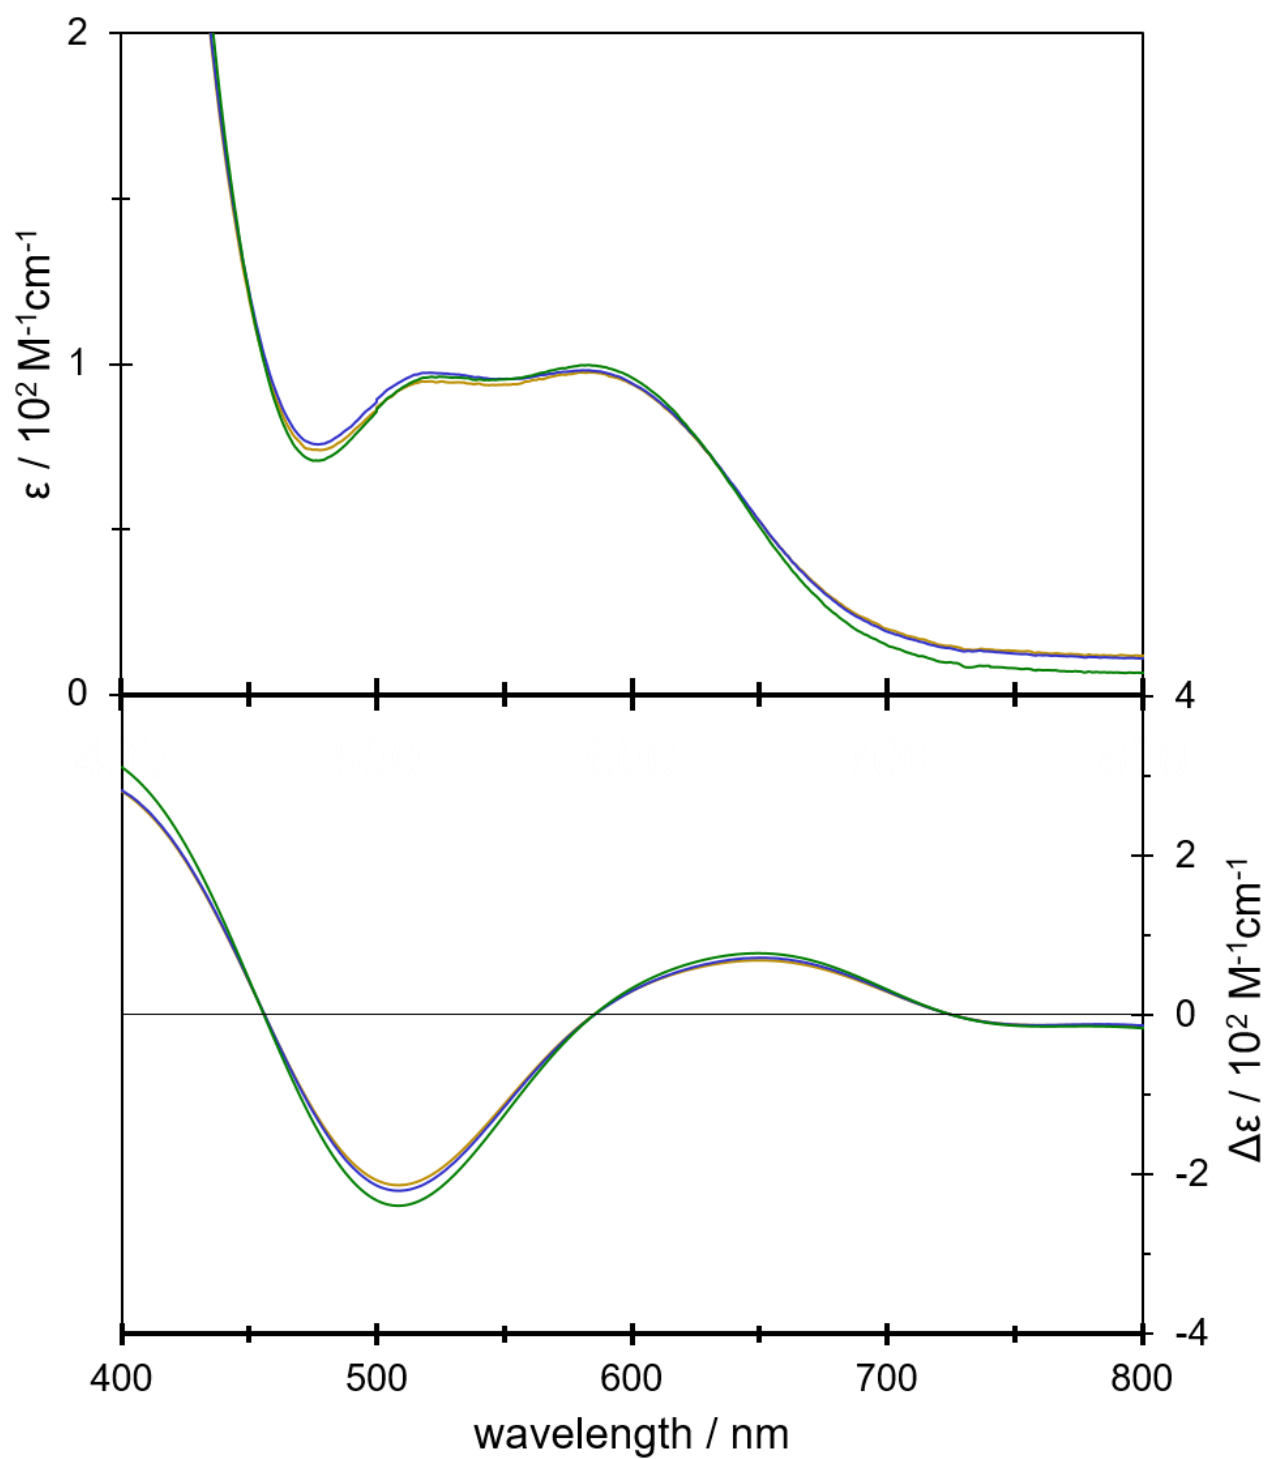

**Figure S17.** Absorption (top) and CD (bottom) spectra in methanol: yellow; **1**<sub>Ca</sub>, blue; **1**<sub>Sr</sub>, and green; **1**<sub>Ba</sub>.

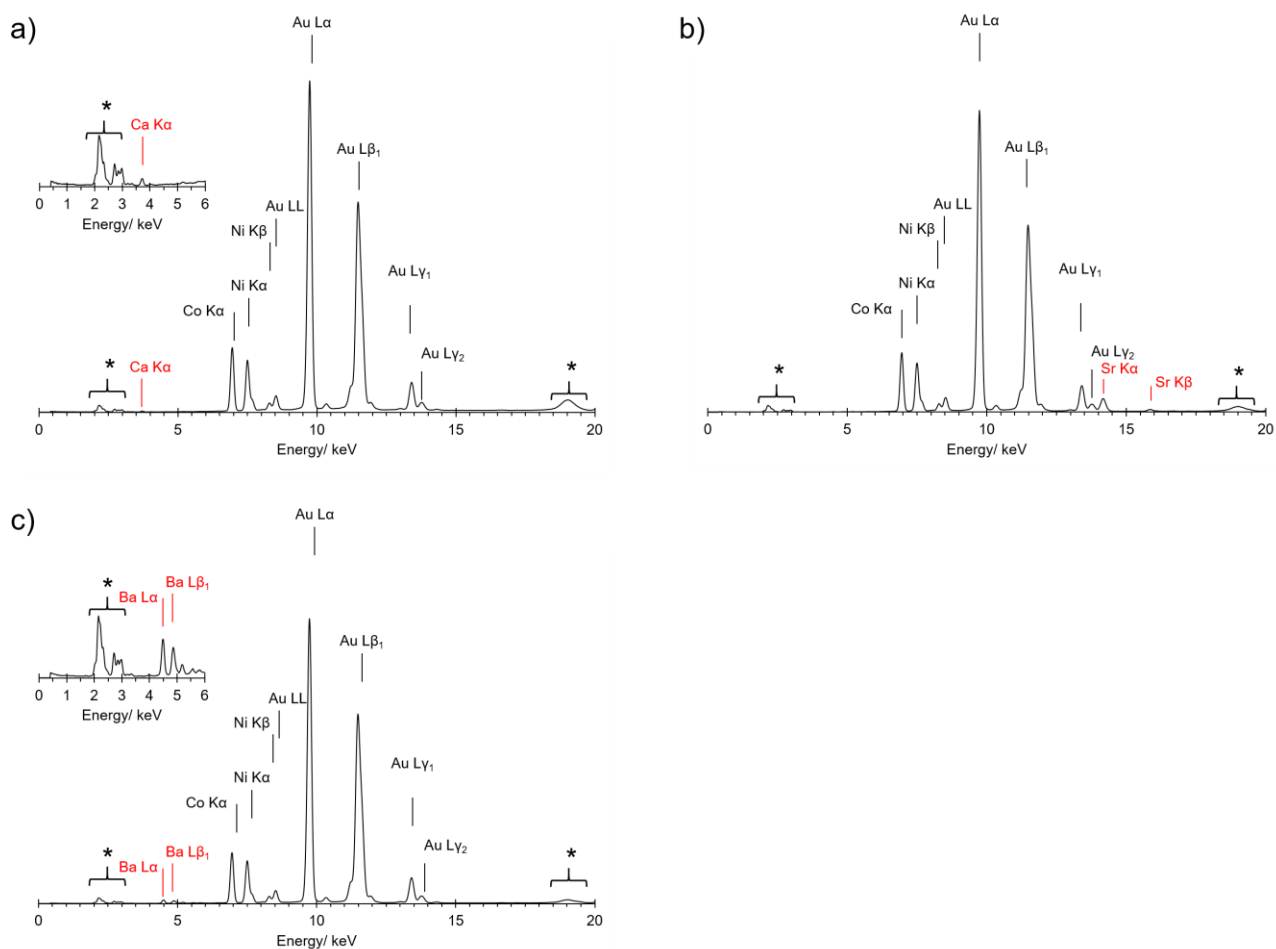

**Figure S18.** X-ray fluorescence spectra of a) 1<sub>Ca</sub>, b) 1<sub>Sr</sub>, and c) 1<sub>Ba</sub>. \* represents signals from the X-ray tube. The inset represents the magnified spectrum (0~6 keV).

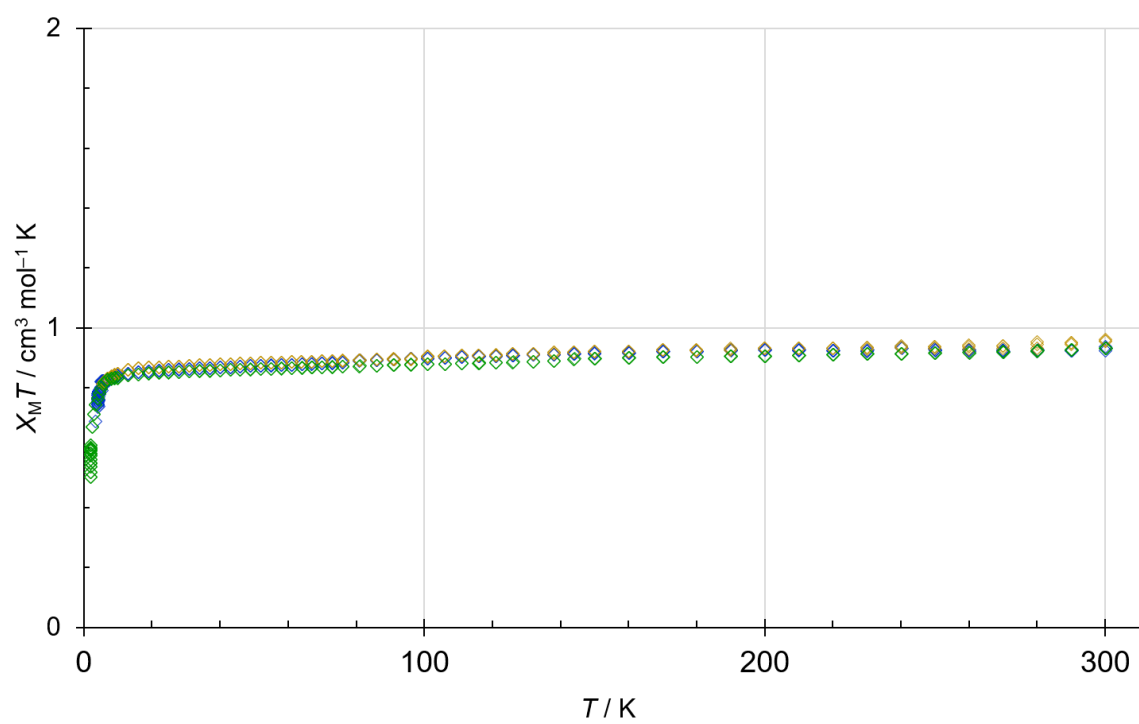

**Figure S19.** The  $\chi_M T$  vs  $T$  plots: yellow; **1Ca**, blue; **1Sr**, and green; **1Ba**.

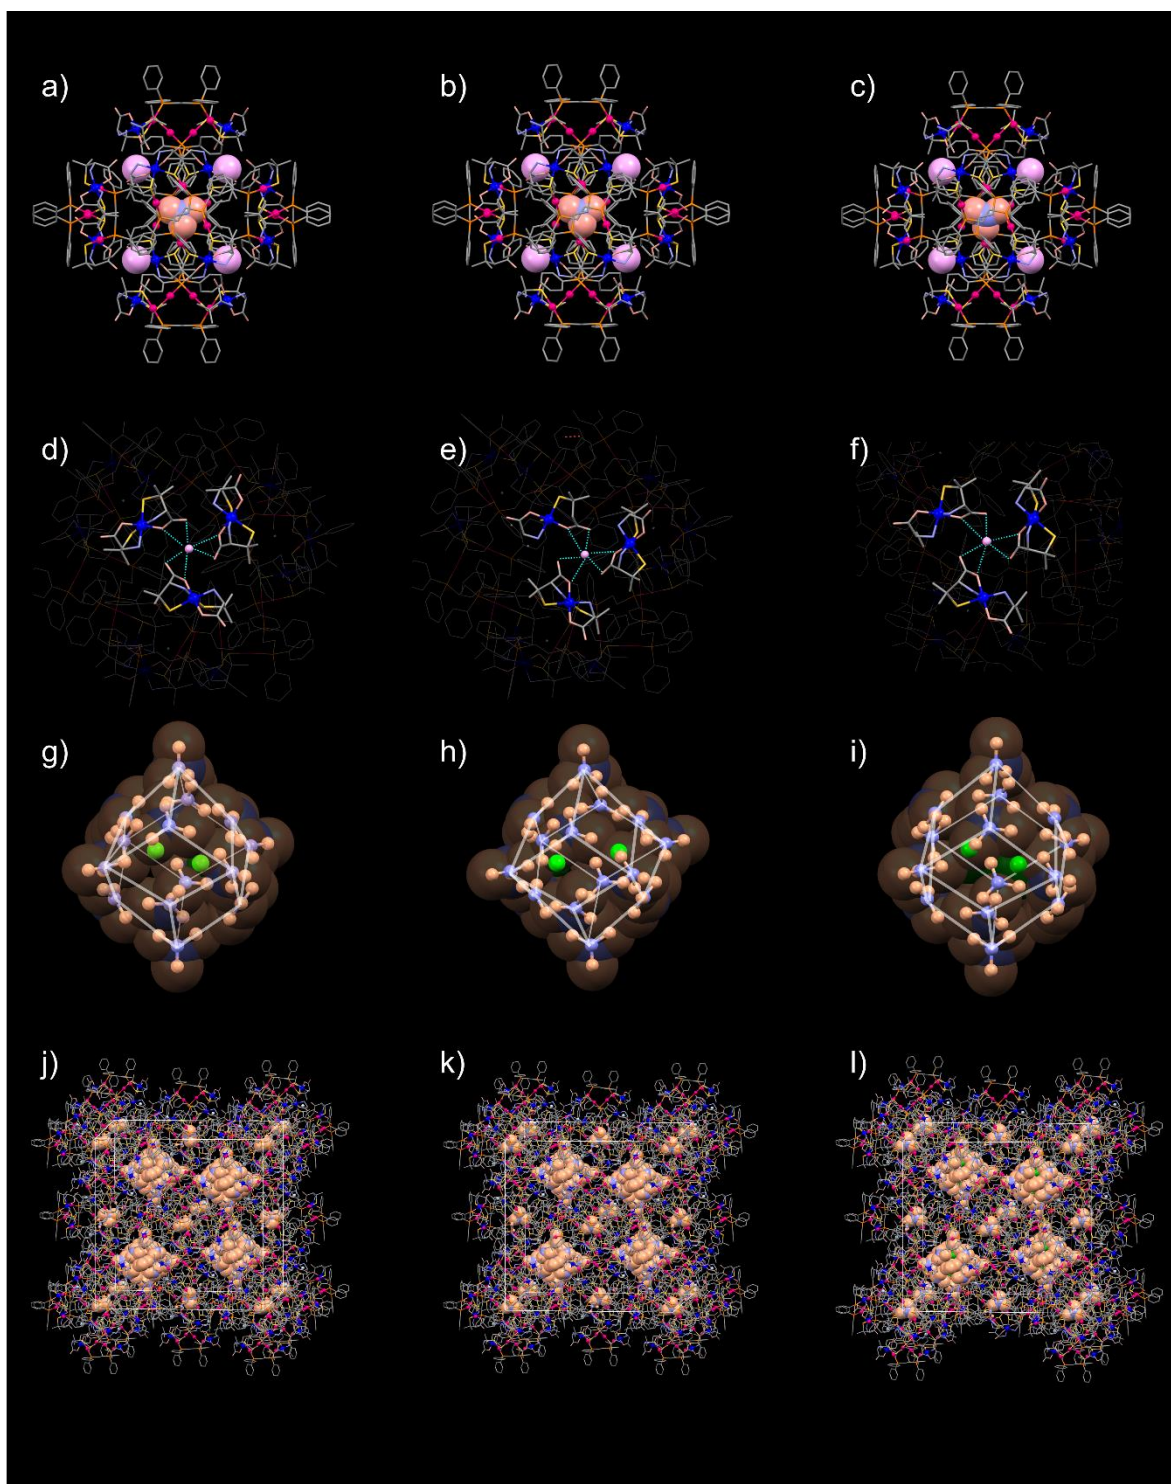

**Figure S20.** Crystal structures of **1<sub>Ca</sub>**, **1<sub>Sr</sub>**, and **1<sub>Ba</sub>**. Cationic supramolecular octahedra in **1<sub>Ca</sub>** (a), **1<sub>Sr</sub>** (b), and **1<sub>Ba</sub>** (c).  $\text{H}_3\text{O}^+$  ions are surrounded by D-pen carboxylate groups in **1<sub>Ca</sub>** (d), **1<sub>Sr</sub>** (e), and **1<sub>Ba</sub>** (f). Rhombic dodecahedron-like nitrate cluster in **1<sub>Ca</sub>** (g), **1<sub>Sr</sub>** (h), and **1<sub>Ba</sub>** (i). Packing structure of **1<sub>Ca</sub>** (j), **1<sub>Sr</sub>** (k), and **1<sub>Ba</sub>** (l). Nitrate anions are represented by a space-filling model. Color codes: red, Au; blue, Co/Ni; orange, P; yellow, S; pink/light orange, O; pale blue, N; gray, C; green, Ca/Sr/Ba.



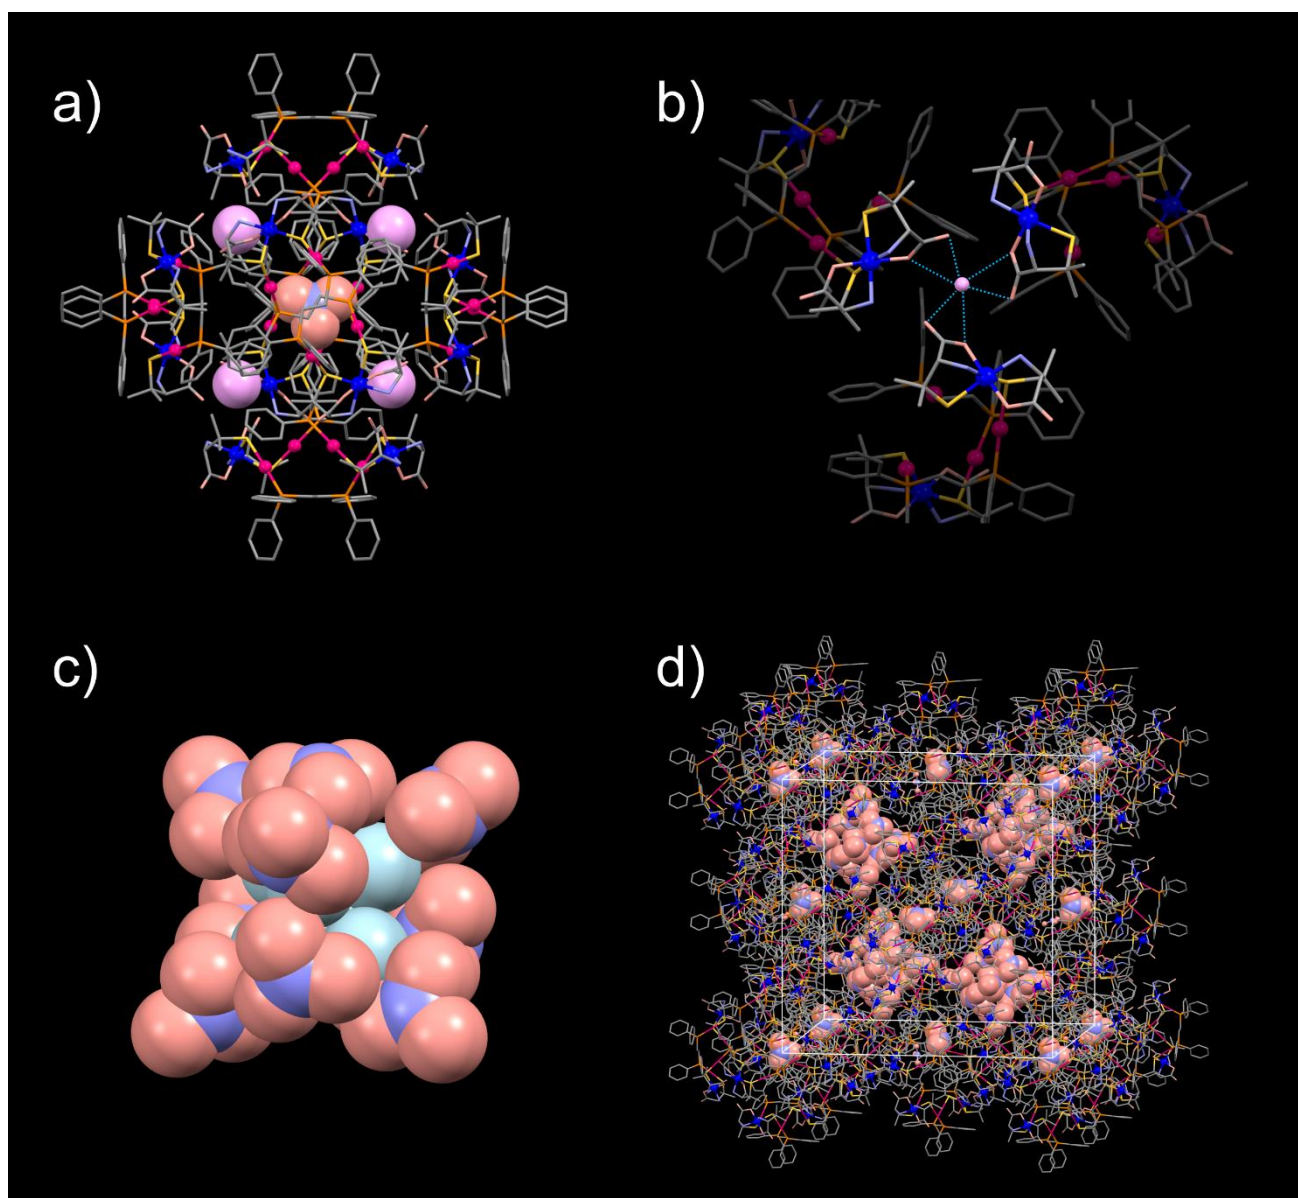

**Figure S21.** Crystal structure of **1<sub>Li</sub>**. (a) Cationic supramolecular octahedron. (b)  $\text{H}_3\text{O}^+$  ion surrounded by D-pen carboxylate groups. (c) Adamantane-like nitrate cluster. (d) Packing structure. Nitrate anions are represented by a space-filling model. Color codes: red, Au; blue, Co/Ni; orange, P; yellow, S; pink/light blue, O; pale blue, N; gray, C; light pink,  $\text{H}_3\text{O}^+$ .
